# Supplementary material for: Fine mapping of copy number variations on two cattle genome assemblies using high density SNP array
Source: PubMed Central journal article supplement (PMC3583728; doi:10.1186/1471-2164-13-376), 2012-08-06

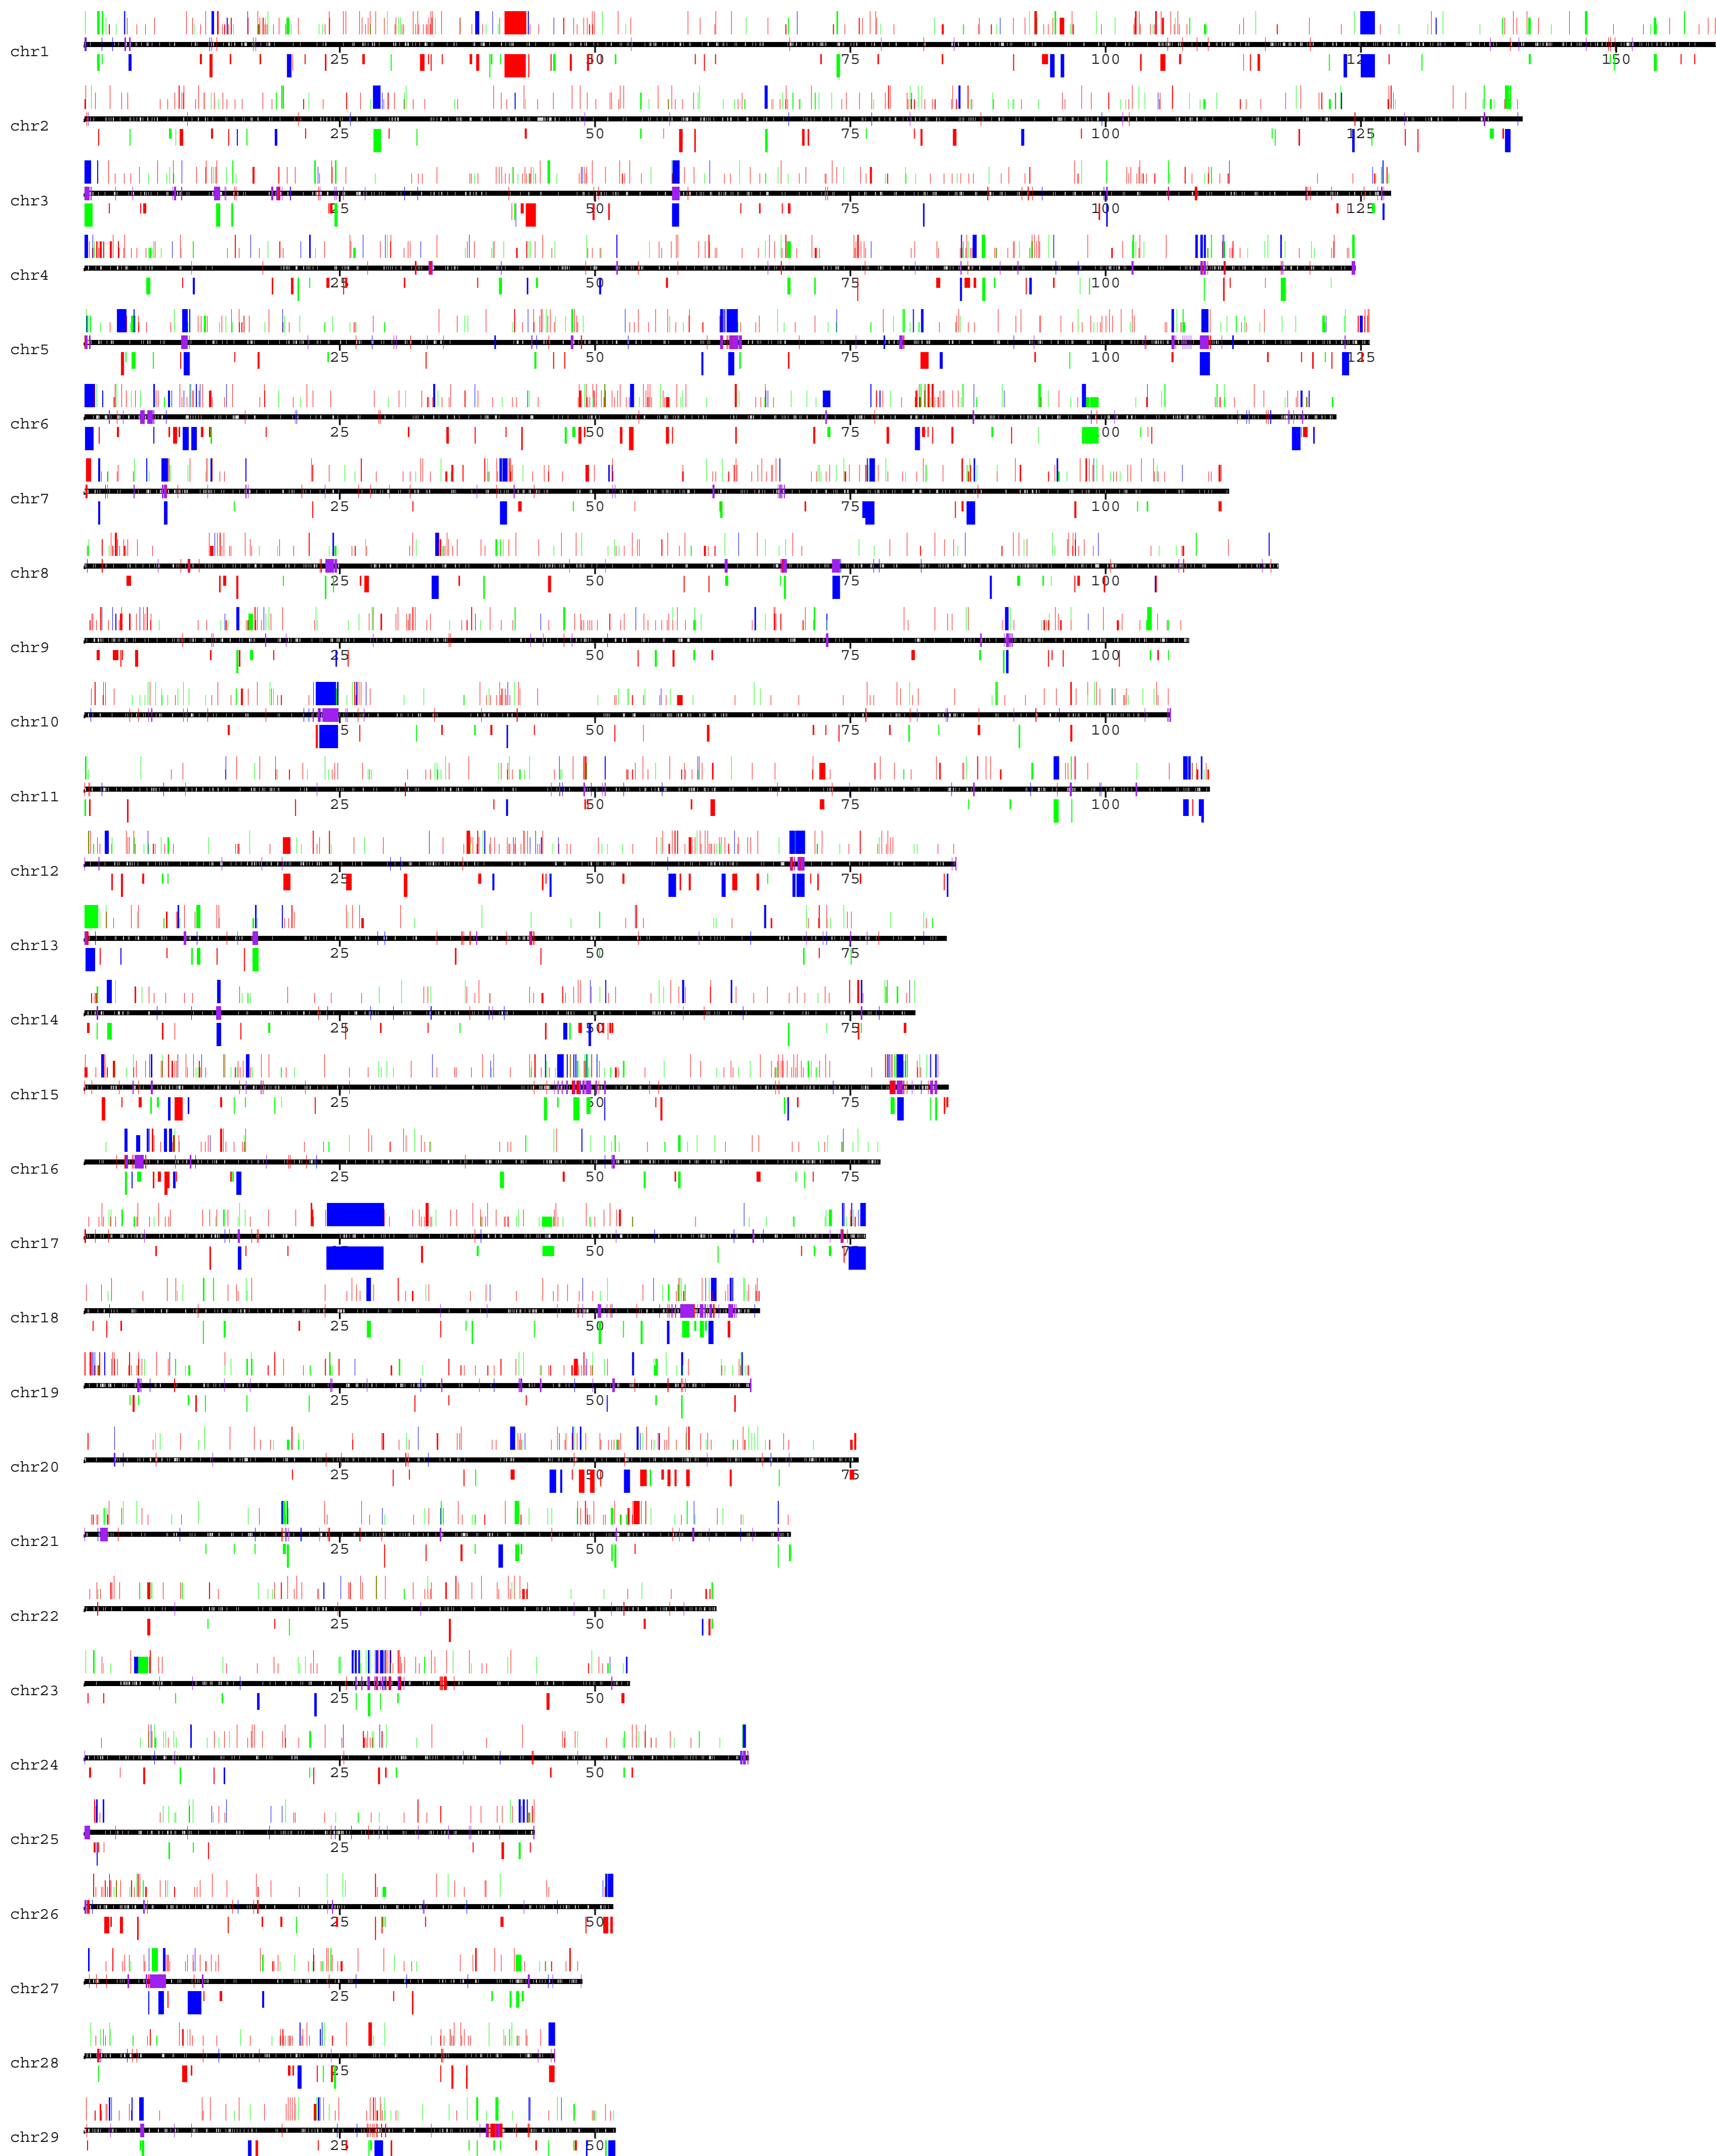

Supplement: 1471-2164-13-376-S7.pdf [file 1471-2164-13-376-S7.pdf]
